# Supplementary material for: Effects of Bovine Pichia kudriavzevii T7, Candida glabrata B14, and Lactobacillus plantarum Y9 on Milk Production, Quality and Digestive Tract Microbiome in Dairy Cows
Source: MDPI journal article supplement (doi:10.3390/microorganisms10050842), 2022-04-20
Supplement: s1 [file s1]

(a)

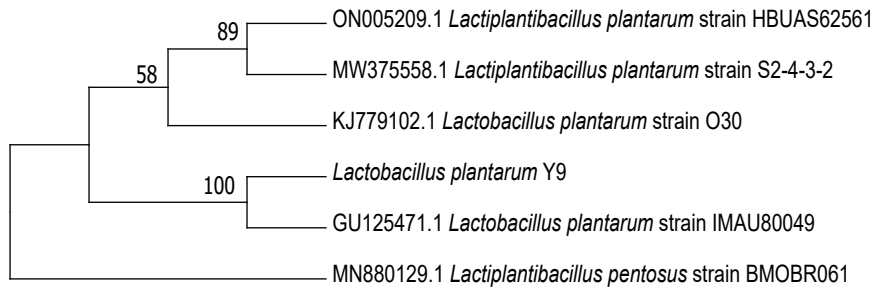

(b)

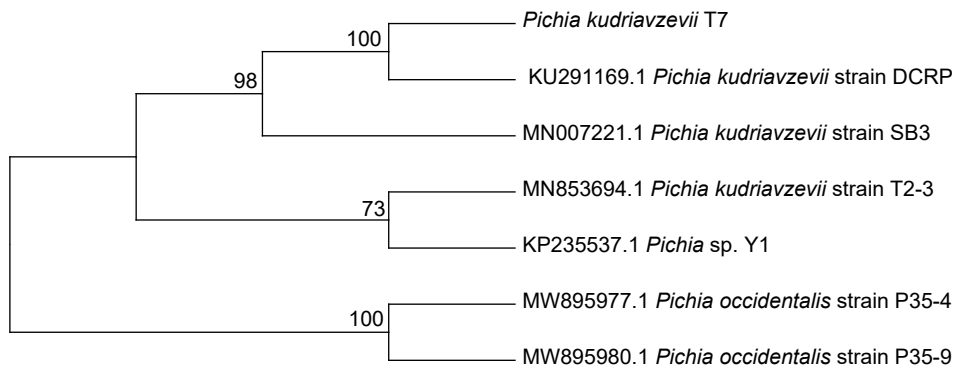

(c)

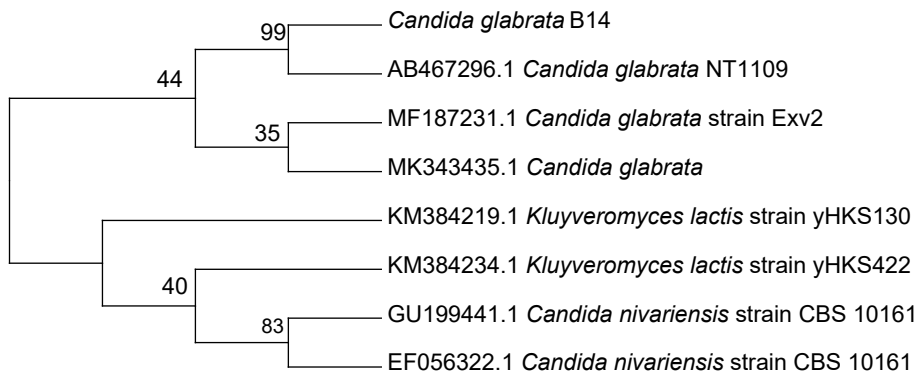

**Figure S1.** Phylogenetic tree of strains isolated from the rumen of high-yielding dairy cows. (a): *Lactobacillus plantarum* Y9, (b): *Pichia kudriavzevii* T7, (c): *Candida glabrata* B14.
