# Supplementary material for: Effects of Bovine Pichia kudriavzevii T7, Candida glabrata B14, and Lactobacillus plantarum Y9 on Milk Production, Quality and Digestive Tract Microbiome in Dairy Cows
Source: MDPI journal article supplement (doi:10.3390/microorganisms10050842), 2022-04-20
Supplement: s1 [file s1]

---

**Supplementary files****Supplementary Table S1.** High throughput sequencing of bacteria and fungus

| group | Bacteria  |           |                    | fungus    |           |                    |
|-------|-----------|-----------|--------------------|-----------|-----------|--------------------|
|       | Sequences | Bases(bp) | Average Length(bp) | Sequences | Bases(bp) | Average Length(bp) |
| CKR   | 37440     | 16568581  | 442.54             | 31975     | 8551376   | 267.44             |
| CKF   | 36637     | 15914646  | 434.39             | 35561     | 9757022   | 274.37             |
| PR    | 37892     | 16704420  | 440.84             | 40374     | 10982508  | 272.02             |
| PF    | 42063     | 18236273  | 433.55             | 30695     | 8424203   | 274.45             |
| GR    | 33413     | 14762029  | 441.8              | 40374     | 10982508  | 272.02             |
| GF    | 43400     | 18650045  | 429.72             | 30695     | 8424203   | 274.45             |
| LR    | 38147     | 16667038  | 436.92             | -         | -         | -                  |
| LF    | 41686     | 18076473  | 433.63             | -         | -         | -                  |

Note: R: Rumen samples of cows, F: Feces samples of cows.
